# Supplementary material
Source: Springer Nature journal article supplement (https://www.springermedizin.de/resource/supplementary/12943_2014_1419_MOESM3_ESM.pdf/9552940)

# Additional file 3: Figure S2

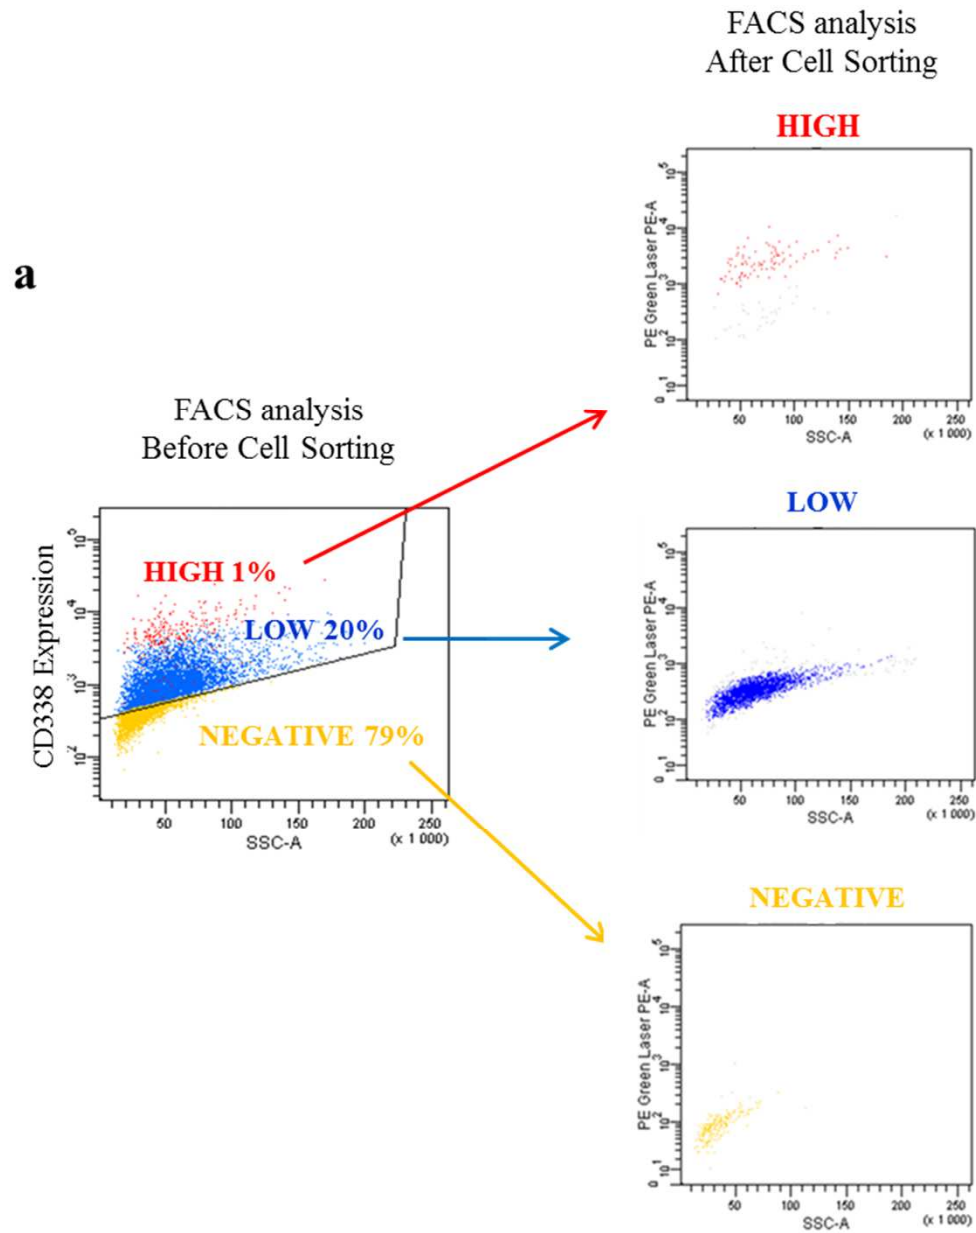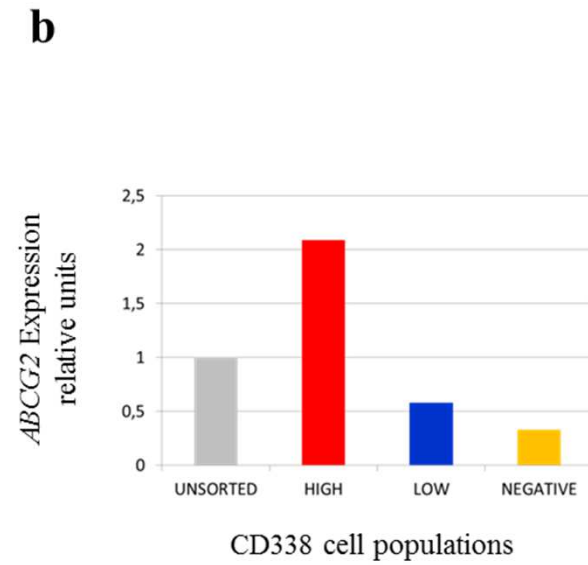

Supplement: MOESM3 [file 9552940]
